# Supplementary material
Source: Springer Nature journal article supplement (https://www.springermedizin.de/resource/supplementary/12939_2006_83_MOESM1_ESM.pdf/9551498)

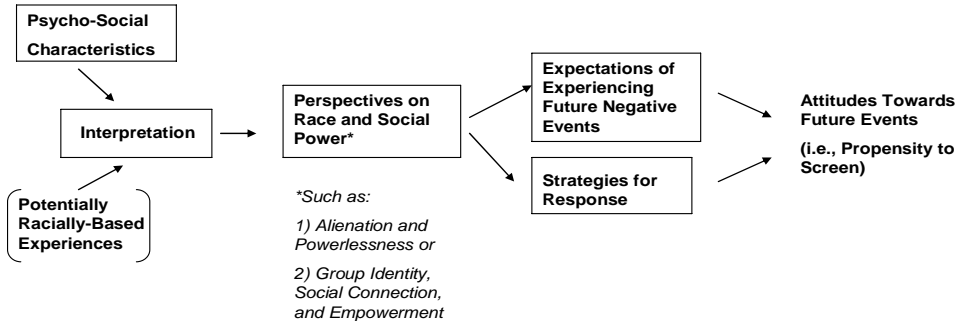

Supplement: MOESM1 [file 9551498]
